# Supplementary material for: Towards Secretome Standardization: Identifying Key Ingredients of MSC-Derived Therapeutic Cocktail
Source: Hindawi journal article supplement (doi:10.1155/2021/3086122), 2021-08-26
Supplement: f1 [file 3086122.f1.zip]

Supplementary table 4\_KEGG pathway enrichment analysis by STRING (FDR&lt;0.05)

| #term ID | term description                                  | observed | background strength | false disc | matching  | matching proteins in your network (labels)                                                           |
|----------|---------------------------------------------------|----------|---------------------|------------|-----------|------------------------------------------------------------------------------------------------------|
| hsa04060 | Cytokine-cytokine receptor interaction            | 19       | 263 1.74            | 3.00e-28   | 9606.ENSF | TNFRSF1A,CSF3,CCL13,IL2,IFNG,IL4,IL5,CXCL13,CSF2,IL13,CSF1,IL17A,PDGFA,FAS,IL2RA,CXCL12,TNF,LTA,CCL4 |
| hsa04630 | Jak-STAT signaling pathway                        | 9        | 160 1.63            | 2.28e-11   | 9606.ENSF | CSF3,IL2,IFNG,IL4,IL5,CSF2,IL13,PDGFA,IL2RA                                                          |
| hsa04657 | IL-17 signaling pathway                           | 8        | 92 1.82             | 2.28e-11   | 9606.ENSF | CSF3,IFNG,IL4,IL5,CSF2,IL13,IL17A,TNF                                                                |
| hsa05321 | Inflammatory bowel disease (IBD)                  | 7        | 62 1.93             | 6.97e-11   | 9606.ENSF | IL2,IFNG,IL4,IL5,IL13,IL17A,TNF                                                                      |
| hsa05330 | Allograft rejection                               | 6        | 35 2.11             | 2.33e-10   | 9606.ENSF | IL2,IFNG,IL4,IL5,FAS,TNF                                                                             |
| hsa04640 | Hematopoietic cell lineage                        | 7        | 94 1.75             | 7.21e-10   | 9606.ENSF | CSF3,IL4,IL5,CSF2,CSF1,IL2RA,TNF                                                                     |
| hsa05323 | Rheumatoid arthritis                              | 6        | 84 1.73             | 2.21e-08   | 9606.ENSF | IFNG,CSF2,CSF1,IL17A,CXCL12,TNF                                                                      |
| hsa04658 | Th1 and Th2 cell differentiation                  | 6        | 88 1.71             | 2.52e-08   | 9606.ENSF | IL2,IFNG,IL4,IL5,IL13,IL2RA                                                                          |
| hsa04064 | NF-kappa B signaling pathway                      | 6        | 93 1.69             | 3.06e-08   | 9606.ENSF | TNFRSF1A,CCL13,CXCL12,TNF,LTA,CCL4                                                                   |
| hsa04940 | Type I diabetes mellitus                          | 5        | 40 1.97             | 3.06e-08   | 9606.ENSF | IL2,IFNG,FAS,TNF,LTA                                                                                 |
| hsa04660 | T cell receptor signaling pathway                 | 6        | 99 1.66             | 3.58e-08   | 9606.ENSF | IL2,IFNG,IL4,IL5,CSF2,TNF                                                                            |
| hsa04668 | TNF signaling pathway                             | 6        | 108 1.62            | 5.40e-08   | 9606.ENSF | TNFRSF1A,CSF2,CSF1,FAS,TNF,LTA                                                                       |
| hsa05200 | Pathways in cancer                                | 9        | 515 1.12            | 9.54e-08   | 9606.ENSF | IL2,IFNG,IL4,IL5,IL13,PDGFA,FAS,IL2RA,CXCL12                                                         |
| hsa05162 | Measles                                           | 6        | 133 1.53            | 1.52e-07   | 9606.ENSF | IL2,IFNG,IL4,IL13,FAS,IL2RA                                                                          |
| hsa05166 | HTLV-I infection                                  | 7        | 250 1.32            | 1.99e-07   | 9606.ENSF | TNFRSF1A,IL2,CSF2,PDGFA,IL2RA,TNF,LTA                                                                |
| hsa04664 | Fc epsilon RI signaling pathway                   | 5        | 67 1.75             | 2.05e-07   | 9606.ENSF | IL4,IL5,CSF2,IL13,TNF                                                                                |
| hsa05310 | Asthma                                            | 4        | 28 2.03             | 4.57e-07   | 9606.ENSF | IL4,IL5,IL13,TNF                                                                                     |
| hsa05332 | Graft-versus-host disease                         | 4        | 36 1.92             | 1.09e-06   | 9606.ENSF | IL2,IFNG,FAS,TNF                                                                                     |
| hsa04659 | Th17 cell differentiation                         | 5        | 102 1.57            | 1.21e-06   | 9606.ENSF | IL2,IFNG,IL4,IL17A,IL2RA                                                                             |
| hsa05142 | Chagas disease (American trypanosomiasis)         | 5        | 101 1.57            | 1.21e-06   | 9606.ENSF | TNFRSF1A,IL2,IFNG,FAS,TNF                                                                            |
| hsa04672 | Intestinal immune network for IgA production      | 4        | 44 1.84             | 1.97e-06   | 9606.ENSF | IL2,IL4,IL5,CXCL12                                                                                   |
| hsa05320 | Autoimmune thyroid disease                        | 4        | 49 1.79             | 2.82e-06   | 9606.ENSF | IL2,IL4,IL5,FAS                                                                                      |
| hsa05168 | Herpes simplex infection                          | 5        | 181 1.32            | 1.62e-05   | 9606.ENSF | TNFRSF1A,IFNG,FAS,TNF,LTA                                                                            |
| hsa04151 | PI3K-Akt signaling pathway                        | 6        | 348 1.11            | 2.15e-05   | 9606.ENSF | CSF3,IL2,IL4,CSF1,PDGFA,IL2RA                                                                        |
| hsa05143 | African trypanosomiasis                           | 3        | 34 1.82             | 5.69e-05   | 9606.ENSF | IFNG,FAS,TNF                                                                                         |
| hsa04380 | Osteoclast differentiation                        | 4        | 124 1.39            | 8.14e-05   | 9606.ENSF | TNFRSF1A,IFNG,CSF1,TNF                                                                               |
| hsa04650 | Natural killer cell mediated cytotoxicity         | 4        | 124 1.39            | 8.14e-05   | 9606.ENSF | IFNG,CSF2,FAS,TNF                                                                                    |
| hsa05418 | Fluid shear stress and atherosclerosis            | 4        | 133 1.35            | 9.87e-05   | 9606.ENSF | TNFRSF1A,IFNG,PDGFA,TNF                                                                              |
| hsa04010 | MAPK signaling pathway                            | 5        | 293 1.11            | 0.00012    | 9606.ENSF | TNFRSF1A,CSF1,PDGFA,FAS,TNF                                                                          |
| hsa05144 | Malaria                                           | 3        | 47 1.68             | 0.00012    | 9606.ENSF | CSF3,IFNG,TNF                                                                                        |
| hsa04217 | Necroptosis                                       | 4        | 155 1.29            | 0.00016    | 9606.ENSF | TNFRSF1A,IFNG,FAS,TNF                                                                                |
| hsa05164 | Influenza A                                       | 4        | 168 1.25            | 0.00021    | 9606.ENSF | TNFRSF1A,IFNG,FAS,TNF                                                                                |
| hsa04062 | Chemokine signaling pathway                       | 4        | 181 1.22            | 0.00027    | 9606.ENSF | CCL13,CXCL13,CXCL12,CCL4                                                                             |
| hsa05140 | Leishmaniasis                                     | 3        | 70 1.51             | 0.00032    | 9606.ENSF | IFNG,IL4,TNF                                                                                         |
| hsa05132 | Salmonella infection                              | 3        | 84 1.43             | 0.00053    | 9606.ENSF | IFNG,CSF2,CCL4                                                                                       |
| hsa05146 | Amoebiasis                                        | 3        | 94 1.38             | 0.00071    | 9606.ENSF | IFNG,CSF2,TNF                                                                                        |
| hsa05145 | Toxoplasmosis                                     | 3        | 109 1.32            | 0.0011     | 9606.ENSF | TNFRSF1A,IFNG,TNF                                                                                    |
| hsa04210 | Apoptosis                                         | 3        | 135 1.22            | 0.0019     | 9606.ENSF | TNFRSF1A,FAS,TNF                                                                                     |
| hsa04932 | Non-alcoholic fatty liver disease (NAFLD)         | 3        | 149 1.18            | 0.0024     | 9606.ENSF | TNFRSF1A,FAS,TNF                                                                                     |
| hsa05010 | Alzheimer's disease                               | 3        | 168 1.13            | 0.0033     | 9606.ENSF | TNFRSF1A,FAS,TNF                                                                                     |
| hsa05152 | Tuberculosis                                      | 3        | 172 1.12            | 0.0035     | 9606.ENSF | TNFRSF1A,IFNG,TNF                                                                                    |
| hsa05167 | Kaposi's sarcoma-associated herpesvirus infection | 3        | 183 1.09            | 0.0040     | 9606.ENSF | TNFRSF1A,CSF2,FAS                                                                                    |
| hsa05014 | Amyotrophic lateral sclerosis (ALS)               | 2        | 50 1.48             | 0.0046     | 9606.ENSF | TNFRSF1A,TNF                                                                                         |
| hsa05205 | Proteoglycans in cancer                           | 3        | 195 1.06            | 0.0046     | 9606.ENSF | PLAUR,FAS,TNF                                                                                        |
| hsa04612 | Antigen processing and presentation               | 2        | 66 1.36             | 0.0074     | 9606.ENSF | IFNG,TNF                                                                                             |
| hsa04920 | Adipocytokine signaling pathway                   | 2        | 69 1.34             | 0.0079     | 9606.ENSF | TNFRSF1A,TNF                                                                                         |
| hsa04350 | TGF-beta signaling pathway                        | 2        | 83 1.26             | 0.0109     | 9606.ENSF | IFNG,TNF                                                                                             |
| hsa05322 | Systemic lupus erythematosus                      | 2        | 94 1.2              | 0.0136     | 9606.ENSF | IFNG,TNF                                                                                             |
| hsa04620 | Toll-like receptor signaling pathway              | 2        | 102 1.17            | 0.0155     | 9606.ENSF | TNF,CCL4                                                                                             |
| hsa05165 | Human papillomavirus infection                    | 3        | 317 0.85            | 0.0155     | 9606.ENSF | TNFRSF1A,FAS,TNF                                                                                     |
| hsa04931 | Insulin resistance                                | 2        | 107 1.15            | 0.0163     | 9606.ENSF | TNFRSF1A,TNF                                                                                         |
| hsa04071 | Sphingolipid signaling pathway                    | 2        | 116 1.11            | 0.0186     | 9606.ENSF | TNFRSF1A,TNF                                                                                         |
| hsa05160 | Hepatitis C                                       | 2        | 131 1.06            | 0.0229     | 9606.ENSF | TNFRSF1A,TNF                                                                                         |
| hsa05161 | Hepatitis B                                       | 2        | 142 1.03            | 0.0262     | 9606.ENSF | FAS,TNF                                                                                              |
| hsa04150 | mTOR signaling pathway                            | 2        | 148 1.01            | 0.0278     | 9606.ENSF | TNFRSF1A,TNF                                                                                         |
| hsa05202 | Transcriptional misregulation in cancer           | 2        | 169 0.95            | 0.0349     | 9606.ENSF | CSF2,PDGFA                                                                                           |
| hsa04015 | Rap1 signaling pathway                            | 2        | 203 0.87            | 0.0479     | 9606.ENSF | CSF1,PDGFA                                                                                           |
