# Supplementary material for: Towards Secretome Standardization: Identifying Key Ingredients of MSC-Derived Therapeutic Cocktail
Source: Hindawi journal article supplement (doi:10.1155/2021/3086122), 2021-08-26
Supplement: f1 [file 3086122.f1.zip]

Supplementary table 2\_Factors undetectable in all ASC-CM samples

| Protein ID | Chemokines           |
|------------|----------------------|
| 6Ckine     | Cytokines            |
| IL-17F     | Receptors            |
| TARC       | Inflammatory factors |
| TECK       | Growth factors       |
| TSLP       |                      |
| Cripto-1   |                      |
| E-Cadherin |                      |
| EpCAM      |                      |
| FAS L      |                      |
| Fcg RIIBC  |                      |
| IL-13 R1   |                      |
| IL-13 R2   |                      |
| NrCAM      |                      |
| IL-1 R4    |                      |
| TRAIL R4   |                      |
| B7-1       |                      |
| BCMA       |                      |
| CD30       |                      |
| CEACAM-1   |                      |
| IL-2 Rg    |                      |
| PECAM-1    |                      |
| TIM-1      |                      |
| IL-1a      |                      |
| AR         |                      |
| BMP-7      |                      |
| b-NGF      |                      |
| EGF        |                      |
| EG-VEGF    |                      |
| FGF-4      |                      |
| GDNF       |                      |
| GH         |                      |
| HB-EGF     |                      |
| IGF-1      |                      |
| Insulin    |                      |
| MCSF R     |                      |
| NGF R      |                      |
| NT-4       |                      |
| SCF        |                      |
| SCF R      |                      |
| TGFa       |                      |
| TGFb3      |                      |
| VEGF R2    |                      |
| VEGF R3    |                      |
| VEGF-D     |                      |
