# Supplementary material for: Towards Secretome Standardization: Identifying Key Ingredients of MSC-Derived Therapeutic Cocktail
Source: Hindawi journal article supplement (doi:10.1155/2021/3086122), 2021-08-26
Supplement: f1 [file 3086122.f1.zip]

Supplementary table 5\_Lipids quantified in all ASC-CM samples, normalized on donor cell number and ranked by CV

| Lipid ID | pg/10 <sup>6</sup> ASCs |         |          |
|----------|-------------------------|---------|----------|
|          | Mean                    | SD      | CV (RSD) |
| SEA      | 78.8                    | 19.7    | 25%      |
| PGE2     | 27.1                    | 7.7     | 28%      |
| PEA      | 92.3                    | 32.8    | 36%      |
| PGF2     | 277.6                   | 129.6   | 47%      |
| DHA      | 1185.1                  | 1111.2  | 94%      |
| AA       | 20976.6                 | 24167.6 | 115%     |
| EPA      | 541.8                   | 652.6   | 120%     |
