# Supplementary material for: Towards Secretome Standardization: Identifying Key Ingredients of MSC-Derived Therapeutic Cocktail
Source: Hindawi journal article supplement (doi:10.1155/2021/3086122), 2021-08-26
Supplement: f1 [file 3086122.f1.zip]

Supplementary table 3\_Factors quantified in all ASC-CM samples, normalized on donor cell number and ranked by CV

| Protein ID            | pg/10 <sup>6</sup> ASC |         |          | Chemokines           |
|-----------------------|------------------------|---------|----------|----------------------|
|                       | Mean                   | SD      | CV (RSD) |                      |
| IL-13                 | 0.21                   | 0.01    | 3%       | Chemokines           |
| IFN $\gamma$          | 7.95                   | 0.28    | 4%       | Cytokines            |
| MIP-1b (CCL4)         | 13.70                  | 0.76    | 6%       | Receptors            |
| RAGE (MOK)            | 34.51                  | 2.68    | 8%       | Inflammatory factors |
| PDGF-AA (PDGFA)       | 152.64                 | 12.09   | 8%       | Growth factors       |
| IL-4                  | 0.33                   | 0.04    | 12%      |                      |
| BLC (CXCL13)          | 0.10                   | 0.01    | 13%      |                      |
| IL-5                  | 6.03                   | 1.00    | 17%      |                      |
| TNF RI (TNFRSF1A)     | 515.32                 | 88.78   | 17%      |                      |
| SDF-1a (CXCL12)       | 10.48                  | 1.85    | 18%      |                      |
| IGFBP-6 (IGFBP-6)     | 5155.56                | 972.21  | 19%      |                      |
| IL-17                 | 0.20                   | 0.04    | 21%      |                      |
| ALCAM                 | 261.62                 | 59.48   | 23%      |                      |
| IL-16                 | 0.80                   | 0.18    | 23%      |                      |
| G-CSF (CSF3)          | 2.50                   | 0.59    | 24%      |                      |
| TNF $\alpha$          | 7.67                   | 1.82    | 24%      |                      |
| IL-2                  | 0.51                   | 0.12    | 24%      |                      |
| GM-CSF (CSF2)         | 6.62                   | 1.63    | 25%      |                      |
| TNFb (LTA)            | 165.67                 | 42.07   | 25%      |                      |
| LYVE-1                | 0.30                   | 0.08    | 27%      |                      |
| uPAR (PLAUR)          | 980.33                 | 267.55  | 27%      |                      |
| MCSF (CSF1)           | 9.89                   | 2.92    | 30%      |                      |
| IL-2 Ra (CD25; ISG20) | 13.45                  | 4.03    | 30%      |                      |
| DKK-1                 | 839.06                 | 251.72  | 30%      |                      |
| Fas                   | 79.08                  | 25.31   | 32%      |                      |
| MCP-4 (CCL13)         | 8.51                   | 2.73    | 32%      |                      |
| XEDAR                 | 39.64                  | 13.63   | 34%      |                      |
| Angiogenin            | 95.31                  | 34.34   | 36%      |                      |
| TIMP-1                | 286.45                 | 103.41  | 36%      |                      |
| PAI-1                 | 440.21                 | 164.68  | 37%      |                      |
| TIMP-2                | 611.26                 | 228.99  | 37%      |                      |
| Lymphotactin          | 334.90                 | 125.55  | 37%      |                      |
| I-TAC                 | 14.87                  | 5.73    | 39%      |                      |
| NRG1-b1               | 0.97                   | 0.38    | 40%      |                      |
| OPN                   | 4097.67                | 1636.69 | 40%      |                      |
| MICB                  | 23.11                  | 9.24    | 40%      |                      |
| IL-15                 | 0.44                   | 0.18    | 40%      |                      |
| OPG                   | 71.72                  | 28.74   | 40%      |                      |
| MCP-1                 | 49.04                  | 19.83   | 40%      |                      |
| IL-17B                | 351.01                 | 142.07  | 40%      |                      |
| HGF                   | 460.49                 | 193.70  | 42%      |                      |
| Eotaxin               | 10.71                  | 4.53    | 42%      |                      |
| CD14                  | 435.13                 | 188.45  | 43%      |                      |
| EGF R                 | 141.73                 | 61.53   | 43%      |                      |
| IL-12p40              | 0.67                   | 0.29    | 44%      |                      |
| Axl                   | 93.98                  | 41.46   | 44%      |                      |
| ICAM-3                | 5.49                   | 2.49    | 45%      |                      |
| VEGF                  | 102.23                 | 48.00   | 47%      |                      |
| Eotaxin-2             | 0.27                   | 0.13    | 48%      |                      |
| IL-21R                | 16.71                  | 8.17    | 49%      |                      |
| SDF-1b                | 17.68                  | 8.72    | 49%      |                      |
| gp130                 | 626.00                 | 309.55  | 49%      |                      |
| Flt-3L                | 10.39                  | 5.15    | 50%      |                      |
| IL-10                 | 0.13                   | 0.06    | 50%      |                      |
| I-309                 | 0.83                   | 0.42    | 50%      |                      |
| ICAM-2                | 80.71                  | 40.52   | 50%      |                      |
| IL-8                  | 20.24                  | 10.25   | 51%      |                      |
| E-Selectin            | 1.16                   | 0.59    | 51%      |                      |
| MICA                  | 11.35                  | 5.77    | 51%      |                      |
| TRAIL R3              | 24.80                  | 12.71   | 51%      |                      |
| IL-1ra                | 18.30                  | 9.48    | 52%      |                      |
| PDGF Rb               | 131.76                 | 68.27   | 52%      |                      |
| HVEM                  | 132.68                 | 71.38   | 54%      |                      |
| PARC                  | 0.08                   | 0.04    | 54%      |                      |
| ErbB3                 | 0.59                   | 0.33    | 56%      |                      |
| ICAM-1                | 211.12                 | 120.47  | 57%      |                      |
| MIP-1a                | 2.21                   | 1.28    | 58%      |                      |
| Cathepsin S           | 283.54                 | 165.78  | 58%      |                      |
| IL-7                  | 4.06                   | 2.57    | 63%      |                      |
| IGFBP-1               | 11.38                  | 7.21    | 63%      |                      |
| Endoglin              | 33.61                  | 21.96   | 65%      |                      |
| NAP-2                 | 0.17                   | 0.11    | 67%      |                      |
| IL-11                 | 3.78                   | 2.59    | 69%      |                      |
| IL-12p70              | 0.10                   | 0.07    | 69%      |                      |
| IL-2 Rb               | 37.44                  | 26.36   | 70%      |                      |
| MIP-3a                | 0.91                   | 0.65    | 71%      |                      |
| Siglec-5              | 9.58                   | 6.89    | 72%      |                      |
| FGF-7                 | 54.53                  | 39.58   | 73%      |                      |
| IL-6R                 | 20.26                  | 14.81   | 73%      |                      |
| LAP(TGfb1)            | 55.56                  | 40.97   | 74%      |                      |

|           |         |         |      |
|-----------|---------|---------|------|
| DR6       | 25.43   | 19.23   | 76%  |
| LIMPII    | 34.76   | 26.40   | 76%  |
| IL-23     | 66.22   | 51.74   | 78%  |
| MIP-1d    | 0.10    | 0.08    | 78%  |
| Dtk       | 3.18    | 2.50    | 79%  |
| PDGF-BB   | 7.51    | 6.12    | 81%  |
| MCP-3     | 21.68   | 18.94   | 87%  |
| TNF RII   | 56.52   | 49.60   | 88%  |
| IL-1 RI   | 0.21    | 0.19    | 91%  |
| IL-9      | 307.09  | 282.27  | 92%  |
| HCC-4     | 0.48    | 0.47    | 97%  |
| ENA-78    | 163.63  | 158.88  | 97%  |
| CXCL16    | 196.07  | 199.24  | 102% |
| GCP-2     | 63.64   | 64.96   | 102% |
| MIG       | 1.64    | 1.72    | 105% |
| RANTES    | 89.38   | 93.87   | 105% |
| TGFb1     | 5370.64 | 5781.30 | 108% |
| IL-28A    | 4.38    | 4.79    | 109% |
| IP-10     | 8.36    | 9.42    | 113% |
| PF4       | 379.29  | 429.50  | 113% |
| IGFBP-2   | 317.66  | 423.03  | 133% |
| DAN       | 301.42  | 420.59  | 140% |
| Eotaxin-3 | 23.95   | 35.29   | 147% |
| IL-17R    | 6.36    | 10.19   | 160% |
