# Supplementary material for: Towards Secretome Standardization: Identifying Key Ingredients of MSC-Derived Therapeutic Cocktail
Source: Hindawi journal article supplement (doi:10.1155/2021/3086122), 2021-08-26
Supplement: f1 [file 3086122.f1.zip]

Supplementary table 6\_Lipids quantified in all ASC pellets, normalized on donor cell number and ranked by CV

| Lipid ID | pg/10 <sup>6</sup> ASCs |          |          |
|----------|-------------------------|----------|----------|
|          | Mean                    | SD       | CV (RSD) |
| DHA      | 51177.2                 | 5271.8   | 10%      |
| AA       | 1052849.3               | 110864.3 | 11%      |
| EPA      | 96793.3                 | 19380.6  | 20%      |
| PGE2     | 1230.6                  | 246.4    | 20%      |
| AEA      | 72.0                    | 16.6     | 23%      |
| SEA      | 1472.0                  | 448.5    | 30%      |
| PGF2     | 423.5                   | 131.4    | 31%      |
| PEA      | 1198.7                  | 547.1    | 46%      |
| 2AG      | 1079.3                  | 518.6    | 48%      |
| OEA      | 920.6                   | 463.1    | 50%      |
| LEA      | 198.1                   | 110.1    | 56%      |
