# Supplementary material for: Towards Secretome Standardization: Identifying Key Ingredients of MSC-Derived Therapeutic Cocktail
Source: Hindawi journal article supplement (doi:10.1155/2021/3086122), 2021-08-26
Supplement: f1 [file 3086122.f1.zip]

Supplementary table 1\_Factors quantified in all ASC-CM samples

|              | [] pg/ml |          |                      |
|--------------|----------|----------|----------------------|
| Protein ID   | Mean     | SD       |                      |
| OPN          | 28,316.2 | 17,490.5 | Chemokines           |
| PF4          | 3,092.0  | 4,143.4  | Cytokines            |
| Lymphotactin | 2,079.9  | 255.4    | Receptors            |
| IL-9         | 1,723.1  | 1,237.5  | Inflammatory factors |
| CXCL16       | 1,105.5  | 887.1    | Growth factors       |
| ENA-78       | 1,043.0  | 886.2    |                      |
| Axl          | 577.7    | 108.6    |                      |
| GCP-2        | 390.7    | 327.1    |                      |
| Eotaxin-3    | 207.1    | 326.7    |                      |
| MCP-3        | 162.2    | 177.2    |                      |
| I-TAC        | 101.5    | 49.4     |                      |
| SDF-1a       | 71.3     | 28.8     |                      |
| MCP-4        | 53.5     | 6.0      |                      |
| IP-10        | 46.9     | 43.1     |                      |
| IL-28A       | 36.0     | 45.4     |                      |
| MIP-3a       | 5.3      | 2.5      |                      |
| HCC-4        | 2.9      | 2.7      |                      |
| NAP-2        | 1.1      | 0.7      |                      |
| PARC         | 0.5      | 0.2      |                      |
| DKK-1        | 5,608.8  | 2,145.4  |                      |
| gp130        | 4,224.3  | 2,181.2  |                      |
| PAI-1        | 2,728.5  | 565.9    |                      |
| IL-17B       | 2,294.7  | 895.3    |                      |
| Cathepsin S  | 1,722.1  | 597.3    |                      |
| DAN          | 1,639.0  | 2,009.9  |                      |
| Angiogenin   | 589.2    | 52.5     |                      |
| ICAM-2       | 567.7    | 414.5    |                      |
| LAP(TGFb1)   | 417.0    | 364.1    |                      |
| IL-23        | 387.1    | 292.3    |                      |
| IL-2 Rb      | 265.4    | 192.6    |                      |
| SDF-1b       | 129.3    | 95.7     |                      |
| IL-2 Ra      | 89.7     | 33.8     |                      |
| Siglec-5     | 65.4     | 44.4     |                      |
| uPAR         | 6,346.8  | 1,647.3  |                      |
| CD14         | 2,689.0  | 521.9    |                      |
| ALCAM        | 1,701.7  | 427.9    |                      |
| HVEM         | 860.4    | 428.6    |                      |
| PDGF Rb      | 858.2    | 426.5    |                      |
| Fas          | 501.7    | 88.9     |                      |
| XEDAR        | 264.6    | 121.6    |                      |
| Endoglin     | 255.4    | 237.9    |                      |
| RAGE         | 228.0    | 60.8     |                      |
| LIMPII       | 221.7    | 144.6    |                      |
| TRAIL R3     | 174.6    | 129.0    |                      |
| DR6          | 152.3    | 79.9     |                      |
| MICB         | 149.7    | 55.7     |                      |
| IL-21R       | 118.0    | 86.4     |                      |
| MICA         | 83.1     | 67.9     |                      |
| Flt-3L       | 66.6     | 27.7     |                      |
| ICAM-3       | 39.1     | 25.1     |                      |
| IL-17R       | 32.1     | 50.7     |                      |
| Dtk          | 23.0     | 22.6     |                      |
| E-Selectin   | 7.2      | 3.0      |                      |
| NRG1-b1      | 6.1      | 1.6      |                      |
| ErbB3        | 4.2      | 3.0      |                      |
| LYVE-1       | 2.1      | 1.2      |                      |

|           |          |          |
|-----------|----------|----------|
| IL-1 RI   | 1.3      | 1.1      |
| TIMP-2    | 3,762.6  | 464.3    |
| TNF RI    | 3,324.5  | 479.0    |
| TIMP-1    | 1,775.5  | 310.6    |
| ICAM-1    | 1,298.0  | 463.6    |
| TNFB      | 1,058.3  | 178.7    |
| RANTES    | 517.5    | 426.9    |
| TNF RII   | 324.0    | 210.5    |
| MCP-1     | 300.5    | 41.1     |
| IL-8      | 137.6    | 87.2     |
| IL-6R     | 122.3    | 61.9     |
| IL-1ra    | 109.0    | 32.6     |
| MIP-1b    | 90.5     | 23.1     |
| MCSF      | 69.0     | 40.5     |
| Eotaxin   | 66.7     | 14.3     |
| IFNg      | 52.8     | 15.0     |
| TNFA      | 49.4     | 9.3      |
| PDGF-BB   | 44.4     | 35.0     |
| GM-CSF    | 42.7     | 9.0      |
| IL-5      | 39.4     | 8.6      |
| IL-11     | 26.2     | 21.4     |
| IL-7      | 24.0     | 9.2      |
| G-CSF     | 15.9     | 0.9      |
| MIP-1a    | 13.0     | 4.7      |
| MIG       | 10.8     | 10.0     |
| I-309     | 5.2      | 1.6      |
| IL-16     | 5.1      | 1.1      |
| IL-12p40  | 4.2      | 0.8      |
| IL-2      | 3.3      | 0.9      |
| IL-15     | 3.2      | 2.3      |
| IL-4      | 2.2      | 1.0      |
| Eotaxin-2 | 1.7      | 0.5      |
| IL-13     | 1.4      | 0.4      |
| IL-17     | 1.3      | 0.1      |
| IL-10     | 0.8      | 0.3      |
| BLC       | 0.7      | 0.2      |
| IL-12p70  | 0.6      | 0.3      |
| MIP-1d    | 0.6      | 0.4      |
| IGFBP-6   | 33,092.5 | 3,758.1  |
| TGFb1     | 30,732.6 | 26,258.4 |
| HGF       | 2,902.6  | 773.3    |
| IGFBP-2   | 1,721.6  | 2,007.6  |
| PDGF-AA   | 1,009.7  | 279.3    |
| EGF R     | 955.5    | 532.4    |
| VEGF      | 642.9    | 247.5    |
| OPG       | 443.6    | 65.3     |
| FGF-7     | 365.2    | 244.0    |
| IGFBP-1   | 68.3     | 26.4     |
